# Supplementary material for: Distinct Blood and Visceral Adipose Tissue Regulatory T Cell and Innate Lymphocyte Profiles Characterize Obesity and Colorectal Cancer
Source: PubMed Central journal article supplement (PMC5465245; doi:10.3389/fimmu.2017.00643), 2017-06-09
Supplement: Image_2.pdf [file Image_2.pdf]

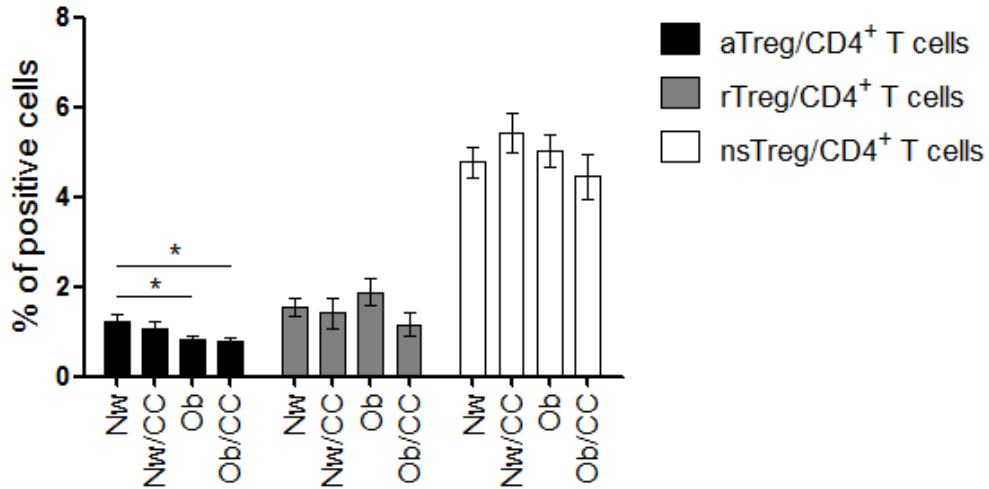

**Figure S2. T<sub>reg</sub> cell subset frequency in PB**

PB lymphocytes isolated from lean (Nw), obese (Ob), lean affected by CRC (Nw/CC) and obese affected by CRC (Ob/CC) donors were analyzed by flow cytometry. Frequencies of aT<sub>reg</sub> cells, (CD4<sup>+</sup>FOXP3<sup>high</sup>CD45RA<sup>-</sup>), rT<sub>reg</sub> cells (CD4<sup>+</sup>FOXP3<sup>low</sup>CD45RA<sup>+</sup>) and nsT<sub>reg</sub> cells, (CD4<sup>+</sup>FOXP3<sup>low</sup>CD45RA<sup>-</sup>) were estimated among CD4<sup>+</sup> T cells. Data are expressed as mean ± SEM. \**p* < 0.05 by ANOVA.
