# Supplementary material for: Distinct Blood and Visceral Adipose Tissue Regulatory T Cell and Innate Lymphocyte Profiles Characterize Obesity and Colorectal Cancer
Source: PubMed Central journal article supplement (PMC5465245; doi:10.3389/fimmu.2017.00643), 2017-06-09
Supplement: Image_3.pdf [file Image_3.pdf]

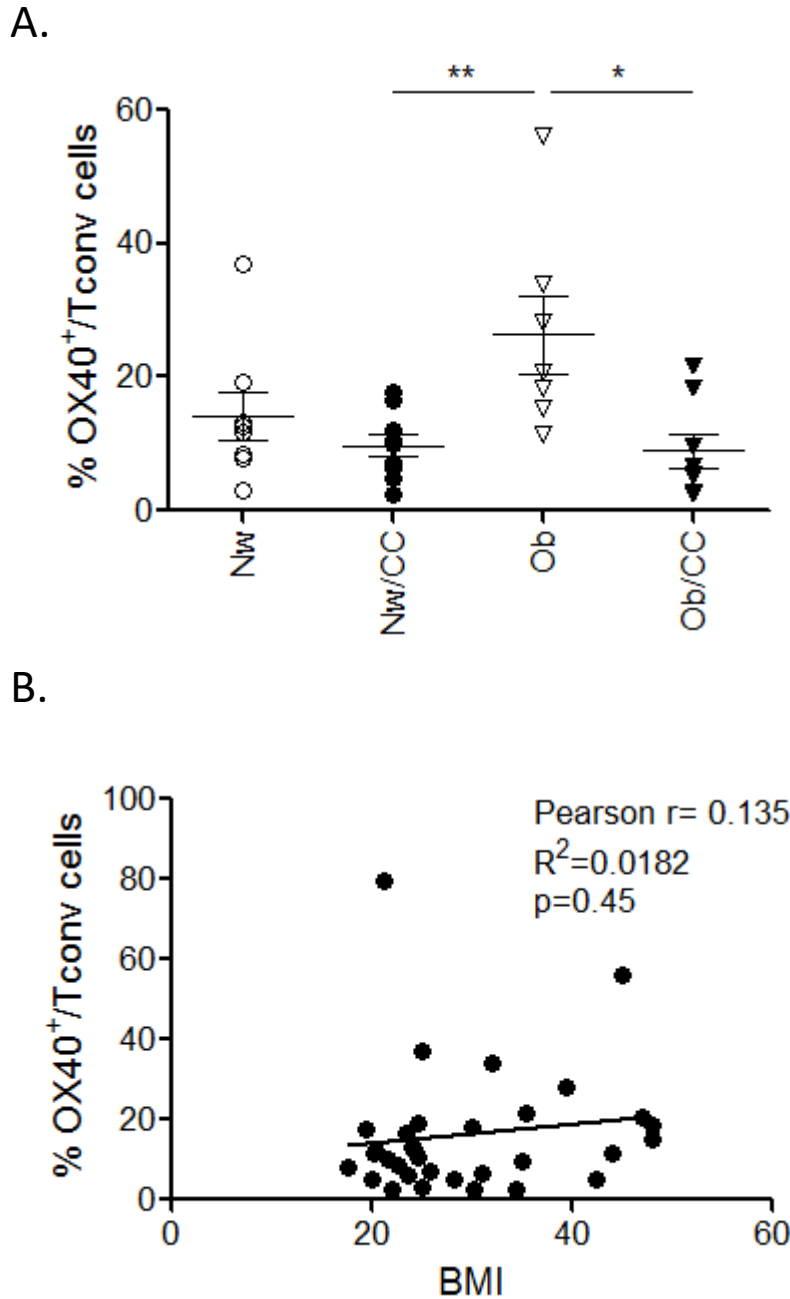

**Figure S3. OX40 expression in VAT T<sub>conv</sub> cells does not correlate with BMI**

PB and VAT SVF lymphocytes isolated from lean (Nw), obese (Ob), lean affected by CRC (Nw/CC) and obese affected by CRC (Ob/CC) donors were analyzed by flow cytometry. Frequency of OX40<sup>+</sup> T cells (among CD4<sup>+</sup>FOXP3<sup>-</sup> T<sub>conv</sub> cells) was estimated in VAT SVF of the 4 groups (A). Each dot represents an individual donor. Mean  $\pm$  SEM is shown for each group. \* $p < 0.05$ ; \*\* $p < 0.01$  by ANOVA. (B) Pearson's correlation ( $r$ ) between OX40<sup>+</sup> T<sub>conv</sub> cell frequency and BMI in all subjects.
